# Supplementary material
Source: PubMed Central journal article supplement (PMC3459579)
Supplement: NIHMS396210-supplement-Supplement1.pdf [file NIHMS396210-supplement-Supplement1.pdf]

## Supplementary Appendix

This appendix has been provided by the authors to give readers additional information about their work.

Supplement to: Shankaran S, Pappas A, McDonald SA, et al. Childhood outcomes after hypothermia for neonatal encephalopathy. *N Engl J Med* 2012;366:2085-92.

## Supplementary Appendix

Supplement to: Shankaran S, Pappas A, McDonald SA., et al. Childhood Outcomes Following Encephalopathy Treated with Hypothermia

### **Contents**

#### Supplemental Table 1:

Characteristics of children with and without data available at 6-7 years pages 1-3

#### Supplemental Table 2:

Parent assessment outcomes at 6-7 years of age pages 4-5

#### Supplemental Table 3:

Concordance of outcome between 18 months and 6-7 years of age (N=140) pages 6-7

Acknowledgements pages 8-11

**Supplemental Table 1. Characteristics of children with and without data available at 6-7 years ≠**

| <b>Characteristics</b>                      | <b>6-7 year outcome<br/>(N = 190)</b> | <b>6-7 year outcome unavailable<br/>(N = 18)</b> |
|---------------------------------------------|---------------------------------------|--------------------------------------------------|
| <b>Maternal</b>                             |                                       |                                                  |
| Race ---no. (%)*                            |                                       |                                                  |
| Black                                       | 66 (35)                               | 6 (33)                                           |
| White                                       | 70 (37)                               | 2 (11)                                           |
| Other                                       | 54 (28)                               | 10 (56)                                          |
| Maternal age--- yr                          | 27.3 ± 6.1                            | 26.8 ± 6.4                                       |
| Married---no. (%)*                          | 110 (59)                              | 5 (29)                                           |
| Gravida ---median no.                       | 2                                     | 2                                                |
| Parity---median no.                         | 2                                     | 1                                                |
| <b>Complications of pregnancy---no. (%)</b> |                                       |                                                  |
| Chronic hypertension                        | 23 (12)                               | 3 (17)                                           |
| Antepartum hemorrhage                       | 28 (15)                               | 2 (11)                                           |
| Thyroid disease                             | 2 (1)                                 | 0                                                |
| Diabetes                                    | 16 (8)                                | 1 (6)                                            |

|                                           |           |           |
|-------------------------------------------|-----------|-----------|
| Intrapartum complications---no. (%)       |           |           |
| Fetal heart rate decelerations            | 137 (72)  | 16 (89)   |
| Cord prolapse                             | 35 (18)   | 2 (11)    |
| Uterine rupture                           | 27 (14)   | 2 (11)    |
| Maternal pyrexia                          | 19 (10)   | 2 (11)    |
| Shoulder dystocia                         | 18 (10)   | 2 (11)    |
| Maternal hemorrhage                       | 14 (7)    | 0         |
| Labor--- hr                               | 12 ± 9    | 12 ± 10   |
| Rupture of membranes--- hr                | 6 ± 10    | 6 ± 8     |
| Emergency cesarean delivery---no. (%)     | 140 (74)  | 12 (67)   |
| <b>Characteristic</b>                     |           |           |
| <b>Neonatal</b>                           |           |           |
| Age at randomization--- hr                | 4.3 ± 1.2 | 4.5 ± 1.1 |
| Transferred from birth hospital---no. (%) | 87 (46)   | 6 (33)    |
| Male sex---no. (%)                        | 106 (56)  | 11 (61)   |
| Apgar score at 5 min ≤ 5---no. (%)        | 173 (92)  | 16 (89)   |

|                                                        |            |            |
|--------------------------------------------------------|------------|------------|
| Apgar score at 10 min ≤ 5---no. (%)                    | 142 (82)   | 12 (71)    |
| Birth weight--- g                                      | 3375 ± 603 | 3401 ± 890 |
| Intubation in delivery room---no. (%)                  | 179 (94)   | 16 (89)    |
| Continued resuscitation at 10 min---no. (%)            | 178 (94)   | 17 (94)    |
| Time to spontaneous respiration ≥ 10 min<br>---no. (%) | 132 (73)   | 8 (50)     |
| Cord blood pH*                                         | 6.8 ± 0.2  | 7.0 ± 0.2  |
| Base deficit mmol/liter                                | 19.5 ± 7.8 | 15.6 ± 6.8 |
| Seizures---no. (%)                                     | 89 (47)    | 5 (28)     |
| Moderate encephalopathy---no. (%)                      | 120 (63)   | 14 (82)    |
| Severe encephalopathy---no. (%)                        | 70 (37)    | 3 (18)     |
| Inotropic support---no. (%)                            | 53 (28)    | 6 (33)     |
| Anticonvulsants---no. (%)                              | 78 (45)    | 5 (29)     |

±Plus-minus values are means ± SD. Percentages are based on the number of mothers or children for whom data was available. Because of rounding, not all percentages sum to 100. \* P Values ≤ 0.05 from Fisher's exact test, T-Test, or Median Test.

**Supplemental Table 2. Parent assessment outcomes at 6-7 years of age**

| <b>Variable</b>                       | <b>Hypothermia Group<br/>(N = 97)<br/>No. (%)</b> | <b>Control Group<br/>(N = 93)<br/>No. (%)</b> | <b>Relative Risk<br/>(95% CI)</b> | <b>P Value</b> |
|---------------------------------------|---------------------------------------------------|-----------------------------------------------|-----------------------------------|----------------|
| <b>Physical Health+</b>               |                                                   |                                               |                                   | <b>0.08</b>    |
| Excellent                             | 36 (54)                                           | 18 (36)                                       |                                   |                |
| Very Good                             | 15 (22)                                           | 14 (28)                                       |                                   |                |
| Good                                  | 14 (21)                                           | 12 (24)                                       |                                   |                |
| Fair                                  | 1 (1)                                             | 6 (12)                                        |                                   |                |
| Poor                                  | 1 (1)                                             | 0                                             |                                   |                |
| <b>Child's self esteem++</b>          |                                                   |                                               |                                   | <b>0.42•</b>   |
| Very satisfied                        | 49 (75)                                           | 35 (76)                                       |                                   |                |
| Somewhat satisfied                    | 11 (17)                                           | 11 (24)                                       |                                   |                |
| Neither satisfied nor dissatisfied    | 5 (8)                                             | 0                                             |                                   |                |
| <b>Emotional Impact on parents+++</b> |                                                   |                                               |                                   | <b>0.08</b>    |
| None at all                           | 33 (49)                                           | 17 (34)                                       |                                   |                |
| A little bit                          | 13 (19)                                           | 10 (20)                                       |                                   |                |

|             |        |        |  |
|-------------|--------|--------|--|
| Some        | 8 (12) | 8 (16) |  |
| Quite a bit | 4 (6)  | 7 (14) |  |
| A lot       | 9 (13) | 8 (16) |  |

+ Parental assessment of child health. Data were unavailable for 3 hypothermia and 2 control group children. P-value from multinomial cumulative logistic regression, adjusted for center.

++ Parental assessment of child's satisfaction with his/her life. Data were unavailable for 5 hypothermia and 6 control children. P-value from Cochran-Armitage trend test.

+++ Parental assessment of worry caused by child's emotional well-being or behavior. Data were unavailable for 3 hypothermia and 2 control children. P-value from multinomial cumulative logistic regression, adjusted for center.

**Supplemental Table 3: Concordance of outcome between 18 months and 6-7 years of age (N=140)**

| Hypothermia                    |                 |                | Control                        |                 |                |
|--------------------------------|-----------------|----------------|--------------------------------|-----------------|----------------|
| Moderate-severe disability     | 6-7 years – Yes | 6-7 years – No | Moderate-severe disability     | 6-7 years – Yes | 6-7 years – No |
| 18 months – Yes                | 15              | 2              | 18 months – Yes                | 18              | 1              |
| 18 months – No                 | 9               | 44             | 18 months – No                 | 1               | 32             |
|                                |                 |                |                                |                 |                |
| Moderate-severe CP             | 6-7 years – Yes | 6-7 years – No | Moderate-severe CP             | 6-7 years – Yes | 6-7 years – No |
| 18 months – Yes                | 12              | 0              | 18 months – Yes                | 14              | 0              |
| 18 months – No                 | 0               | 56             | 18 months – No                 | 1               | 35             |
|                                |                 |                |                                |                 |                |
| Blindness                      | 6-7 years – Yes | 6-7 years – No | Blindness                      | 6-7 years – Yes | 6-7 years – No |
| 18 months – Yes                | 1               | 1              | 18 months – Yes                | 2               | 3              |
| 18 months – No                 | 0               | 63             | 18 months – No                 | 0               | 44             |
|                                |                 |                |                                |                 |                |
| Hearing impairment (with aids) | 6-7 years – Yes | 6-7 years – No | Hearing impairment (with aids) | 6-7 years – Yes | 6-7 years – No |
| 18 months – Yes                | 1               | 0              | 18 months – Yes                | 1               | 2              |
| 18 months – No                 | 2               | 59             | 18 months – No                 | 0               | 46             |
|                                |                 |                |                                |                 |                |
| Seizure disorder               | 6-7 years – Yes | 6-7 years – No | Seizure disorder               | 6-7 years – Yes | 6-7 years – No |
| 18 months – Yes                | 4               | 6              | 18 months – Yes                | 5               | 5              |
| 18 months – No                 | 3               | 54             | 18 months – No                 | 3               | 34             |



Hypothermia group: sensitivity: 63%, specificity 96%, positive predictive value 88% and negative predictive value 83% for moderate/severe disability at 6 to 7 years of age for children disabled at 18 months of age.

Control group: sensitivity: 95%, specificity 97%, positive predictive value 95% and negative predictive value 97% for moderate/severe disability at 6 to 7 years of age for children disabled at 18 months of age.

Hypothermia group: sensitivity: 100%, specificity 100%, positive predictive value 100% and negative predictive value 100% for moderate-severe cerebral palsy at 6 to 7 years of age for children with moderate-severe CP at 18 months of age.

Control group: sensitivity: 93%, specificity 100%, positive predictive value 100% and negative predictive value 97% for moderate-severe cerebral palsy at 6 to 7 years of age for children with moderate-severe CP at 18 months of age.

The odds of disability at 6 to 7 years for an infant disabled at the earlier age, compared to an infant who was not disabled was 37 times higher (95 percent confidence interval 7-189) in the hypothermia group and 576 times higher (95 percent confidence interval 34-9774) in the control group.

The following investigators, in addition to those listed as authors, participated in this study:

NRN Steering Committee Chairs: Alan H. Jobe, MD PhD, University of Cincinnati (2003-2006);  
Michael S. Caplan, MD, University of Chicago, Pritzker School of Medicine (2006- 2011).

Alpert Medical School of Brown University and Women & Infants Hospital of Rhode Island (U10 HD27904) – Abbot R. Laptook, MD; William Oh, MD; Angelita M. Hensman, RN BSN; Lucy Noel; Victoria E. Watson, MS CAS.

*Case Western Reserve University, Rainbow Babies & Children's Hospital (U10 HD21364, M01 RR80)* – Michele C. Walsh, MD MS; Avroy A. Fanaroff, MD; Nancy Bass, MD; Harriet G. Friedman MA; Nancy S. Newman, BA RN; Bonnie S. Siner, RN.

Cincinnati Children's Hospital Medical Center and University of Cincinnati Hospital (U10 HD27853, M01 RR8084) – Kurt Schibler, MD; Edward F. Donovan, MD; Kate Bridges, MD; Jean J. Steichen, MD; Barbara Alexander, RN; Cathy Grisby, BSN CCRC; Holly L. Mincey, RN BSN; Jody Hessling, RN; Teresa L. Gratton, PA.

Duke University School of Medicine, University Hospital, Alamance Regional Medical Center, and Durham Regional Hospital (U10 HD40492, M01 RR30) – Ronald N. Goldberg, MD; C. Michael Cotten, MD MHS; Kathryn E. Gustafson, PhD; Kathy J. Auten, MSHS; Katherine A. Foy, RN; Kimberley A. Fisher, PhD FNP-BC IBCLC; Sandy Grimes, RN BSN; Melody B. Lohmeyer, RN MSN.

Emory University, Grady Memorial Hospital and Emory University Hospital Midtown (U10 HD27851, M01 RR39) – Barbara J. Stoll, MD; David P. Carlton, MD; Lucky Jain, MD; Ann M. Blackwelder, RNC BS MS; Ellen C. Hale, RN BS CCRC; Sobha Fritz, PhD.

*Eunice Kennedy Shriver* National Institute of Child Health and Human Development – Linda L. Wright, MD; Elizabeth M. McClure, MEd; Stephanie Wilson Archer, MA.

Indiana University, University Hospital, Methodist Hospital, Riley Hospital for Children, and Wishard Health Services (U10 HD27856, M01 RR750) – Brenda B. Poindexter, MD MS; James A. Lemons, MD; Diana D. Appel, RN BSN; Jessica Bissey, PsyD HSPP; Dianne E. Herron, RN; Lucy C. Miller, RN BSN CCRC; Leslie Richard, RN; Leslie Dawn Wilson, BSN CCRC.

RTI International (U10 HD36790) – W. Kenneth Poole, PhD; Jeanette O’Donnell Auman, BS; Margaret Cunningham, BS; Betty K. Hastings; Jamie E. Newman, PhD MPH; Scott E. Schaefer, MS; Kristin M. Zaterka-Baxter, RN BSN.

Stanford University and Lucile Packard Children's Hospital (U10 HD27880, M01 RR70) –Krisa P. Van Meurs, MD; David K. Stevenson, MD; M. Bethany Ball, BS CCRC; Maria Elena DeAnda, PhD.

University of Alabama at Birmingham Health System and Children’s Hospital of Alabama (U10 HD34216, M01 RR32) – Waldemar A. Carlo, MD; Namasivayam Ambalavanan, MD; Kathleen G. Nelson, MD; Monica V. Collins, RN BSN MaEd; Shirley S. Cosby, RN BSN; Vivien A. Phillips, RN BSN; Laurie Lou Smith, EdS NCSP.

University of California-San Diego Medical Center and Sharp Mary Birch Hospital for Women (U10 HD40461) - Martha G. Fuller, RN MSN; Radmila West PhD; Neil N. Finer, MD; David Kaegi, MD; Maynard R. Rasmussen, MD; Kathy Arnell, RNC; Chris Henderson, RCP CRTT; Wade Rich, BSHS RRT.

University of Miami Holtz Children's Hospital (U10 HD21397, M01 RR16587) – Shahnaz Duara, MD; Sylvia Hiriart-Fajardo, MD; Mary Allison, RN; Maria Calejo, MS; Ruth Everett-Thomas, RN MSN; Silvia M. Frade Eguaras, MA; Susan Gauthier, BA.

University of Rochester Medical Center, Golisano Children's Hospital (U10 HD40521, M01 RR44) – Dale L. Phelps, MD; Gary J. Myers, MD; Diane Hust, MS RN CS; Linda J. Reubens, RN CCRC.

University of Texas Southwestern Medical Center at Dallas, Parkland Health & Hospital System, and Children's Medical Center Dallas (U10 HD40689, M01 RR633) – Pablo J. Sánchez, MD; R. Sue Broyles, MD; Abbot R. Laptook, MD; Charles R. Rosenfeld, MD; Walid A. Salhab, MD; Roy J. Heyne, MD; Cathy Boatman, MS CIMI; Cristin Dooley, PhD LSSP; Gaynelle Hensley, RN; Jackie F. Hickman, RN; Melissa H. Leps, RN; Susie Madison, RN; Nancy A. Miller, RN; Janet S. Morgan, RN; Lizette E. Torres, RN; Alicia Guzman.

University of Texas Health Science Center at Houston Medical School, Children's Memorial Hermann Hospital, and Lyndon Baines Johnson General Hospital/Harris County Hospital District (U10 HD21373, M01 RR2588) – Jon E. Tyson, MD MPH; Kathleen A. Kennedy, MD MPH; Esther G. Akpa, RN BSN; Patty A. Cluff, RN; Claudia I. Franco, RN BSN; Anna E. Lis, RN, BSN; Georgia E. McDavid, RN; Patti L. Pierce Tate, RCP; Nora I. Alaniz, BS; Pamela J. Bradt, MD MPH; Magda Cedillo; Susan Dieterich, PhD; Patricia W. Evans, MD; Charles Green, PhD; Margarita Jiminez,

MD; Terri Major-Kincade, MD MPH; Brenda H. Morris, MD; M. Layne Poundstone, RN BSN; Stacey Reddoch, BA; Saba Siddiki, MD; Maegan C. Simmons, RN; Laura L. Whitely, MD; Sharon L. Wright, MT; Lourdes M. Valdés PhD.

Wayne State University, Hutzel Women's Hospital, and Children's Hospital of Michigan (U10 HD21385) – Yvette R. Johnson, MD MPH; Laura A. Goldston, MA; Geraldine Muran, RN BSN; Deborah Kennedy, RN BSN; Patrick J. Pruitt, BS.

Yale University, Yale-New Haven Children's Hospital (U10 HD27871, M01 RR125, UL1 RR24139) – Patricia Gettner, RN; Monica Konstantino, RN BSN; JoAnn Poulsen, RN; Elaine Romano, MSN; Joanne Williams, RN BSN; Susan DeLancy, MA CAS.

### **Disclosures**

Dr. Cotten reports having served on the data and safety monitoring board for the Inhibitex phase 3 study of Vernolate for the prevention of infections in preterm infants. Dr. Donovan reports having received support from the Environmental Protection Agency (Lanphear) and the Gerber Foundation. Dr. Carlo reports having served on the advisory board of Pediatrix Medical Group and ParadigmHealth and holding stock options at the Pediatrix Medical Group. Dr. Stevenson reports having received research support from Pfizer.
